# Supplementary material for: A New Technique for Analysing Interacting Factors Affecting Biodiversity Patterns: Crossed-DPCoA
Source: PubMed Central journal article supplement (PMC3554745; doi:10.1371/journal.pone.0054530), 2013-01-24
Supplement: pone.0054530.s006.pdf [file pone.0054530.s006.pdf]

## **Text S5 – Species whose positions in the phylogeny were not defined by Davis**

14 species out of 89 were not positioned in [1].

The following species were placed according to [2]:

*Columba oenas*, *Dendrocopos medius*, *Dryocopus martius*, *Galerida cristata*, *G. theklae*,  
*Locustella naevia*, *Lullula arborea*, *Luscinia luscinia*, *L. megarhynchos*, *Turdus viscivorus*

The following species was placed according to [3]:

*Emberiza hortulana*

Three species have been placed as follows:

- *Corvus cornix* has been placed based on *Corvus corone* the position of which was given in [1];
- *Oenanthe hispanica* has been placed based on the position of *Oenanthe oenanthe* in [2];
- *Picus vaillantii* has been placed with *P. canus* and *P. viridis*.

References:

- [1] Davis KE (2008) Reweaving the tapestry: a supertree of birds. PhD Thesis. University of Glasgow, Glasgow, U.K.  
<http://linnaeus.zoology.gla.ac.uk/~rpage/birdsupertree/index.php>
- [2] Møller AP (2006) Sociality, age at first reproduction and senescence: comparative analyses of birds. *J evolution biol* 19: 682-689
- [3] Alström P, Olsson U, Lei F, Wang H-T, Gao W, Sundberg P (2008) Phylogeny and classification of the Old World Emberizini (Aves, Passeriformes). *Mol Phylogenet Evol* 47: 960-973.
