# Supplementary material for: A New Technique for Analysing Interacting Factors Affecting Biodiversity Patterns: Crossed-DPCoA
Source: PubMed Central journal article supplement (PMC3554745; doi:10.1371/journal.pone.0054530), 2013-01-24
Supplement: pone.0054530.s007.pdf [file pone.0054530.s007.pdf]

### Text S6 – Taxonomy used for the 89 bird species.

Species are given in the same order as in Fig. 3 of the main text.

|                                      | <b>Family</b> | <b>Order</b>  |
|--------------------------------------|---------------|---------------|
| <i>Emberiza calandra</i>             | Emberizidae   | Passeriformes |
| <i>Emberiza hortulana</i>            | Emberizidae   | Passeriformes |
| <i>Emberiza cirius</i>               | Emberizidae   | Passeriformes |
| <i>Emberiza citrinella</i>           | Emberizidae   | Passeriformes |
| <i>Fringilla coelebs</i>             | Fringillidae  | Passeriformes |
| <i>Carduelis carduelis</i>           | Fringillidae  | Passeriformes |
| <i>Carduelis citrinella</i>          | Fringillidae  | Passeriformes |
| <i>Serinus serinus</i>               | Fringillidae  | Passeriformes |
| <i>Serinus canaria</i>               | Fringillidae  | Passeriformes |
| <i>Carduelis cannabina</i>           | Fringillidae  | Passeriformes |
| <i>Carduelis chloris</i>             | Fringillidae  | Passeriformes |
| <i>Coccothraustes coccothraustes</i> | Fringillidae  | Passeriformes |
| <i>Pyrrhula pyrrhula</i>             | Fringillidae  | Passeriformes |
| <i>Motacilla alba</i>                | Motacillidae  | Passeriformes |
| <i>Anthus trivialis</i>              | Motacillidae  | Passeriformes |
| <i>Anthus campestris</i>             | Motacillidae  | Passeriformes |
| <i>Prunella modularis</i>            | Prunellidae   | Passeriformes |
| <i>Regulus ignicapillus</i>          | Regulidae     | Passeriformes |
| <i>Sturnus vulgaris</i>              | Sturnidae     | Passeriformes |
| <i>Sturnus unicolor</i>              | Sturnidae     | Passeriformes |
| <i>Saxicola torquata</i>             | Turdidae      | Passeriformes |
| <i>Saxicola rubetra</i>              | Turdidae      | Passeriformes |
| <i>Turdus philomelos</i>             | Turdidae      | Passeriformes |
| <i>Turdus viscivorus</i>             | Turdidae      | Passeriformes |
| <i>Muscicapa striata</i>             | Muscicapidae  | Passeriformes |
| <i>Erithacus rubecula</i>            | Muscicapidae  | Passeriformes |
| <i>Ficedula hypoleuca</i>            | Muscicapidae  | Passeriformes |
| <i>Ficedula albicollis</i>           | Muscicapidae  | Passeriformes |
| <i>Luscinia luscinia</i>             | Muscicapidae  | Passeriformes |
| <i>Luscinia megarhynchos</i>         | Muscicapidae  | Passeriformes |
| <i>Phoenicurus phoenicurus</i>       | Muscicapidae  | Passeriformes |
| <i>Oenanthe hispanica</i>            | Muscicapidae  | Passeriformes |
| <i>Turdus merula</i>                 | Turdidae      | Passeriformes |
| <i>Troglodytes troglodytes</i>       | Troglodytidae | Passeriformes |
| <i>Certhia familiaris</i>            | Certhiidae    | Passeriformes |
| <i>Certhia brachydactyla</i>         | Certhiidae    | Passeriformes |
| <i>Sitta europaea</i>                | Sittidae      | Passeriformes |
| <i>Poecile montana</i>               | Paridae       | Passeriformes |
| <i>Poecile palustris</i>             | Paridae       | Passeriformes |
| <i>Lophophanes cristatus</i>         | Paridae       | Passeriformes |
| <i>Periparus ater</i>                | Paridae       | Passeriformes |
| <i>Parus major</i>                   | Paridae       | Passeriformes |
| <i>Cyanistes caeruleus</i>           | Paridae       | Passeriformes |
| <i>Sylvia atricapilla</i>            | Sylviidae     | Passeriformes |

|                                |                |               |
|--------------------------------|----------------|---------------|
| <i>Sylvia borin</i>            | Sylviidae      | Passeriformes |
| <i>Sylvia melanocephala</i>    | Sylviidae      | Passeriformes |
| <i>Sylvia cantillans</i>       | Sylviidae      | Passeriformes |
| <i>Sylvia conspicillata</i>    | Sylviidae      | Passeriformes |
| <i>Sylvia undata</i>           | Sylviidae      | Passeriformes |
| <i>Sylvia sarda</i>            | Sylviidae      | Passeriformes |
| <i>Sylvia communis</i>         | Sylviidae      | Passeriformes |
| <i>Sylvia hortensis</i>        | Sylviidae      | Passeriformes |
| <i>Hippolais polyglotta</i>    | Acrocephalidae | Passeriformes |
| <i>Hippolais icterina</i>      | Acrocephalidae | Passeriformes |
| <i>Phylloscopus collybita</i>  | Phylloscopidae | Passeriformes |
| <i>Phylloscopus trochilus</i>  | Phylloscopidae | Passeriformes |
| <i>Phylloscopus sibilatrix</i> | Phylloscopidae | Passeriformes |
| <i>Phylloscopus bonelli</i>    | Phylloscopidae | Passeriformes |
| <i>Cisticola juncidis</i>      | Cisticolidae   | Passeriformes |
| <i>Locustella fluviatilis</i>  | Megaluridae    | Passeriformes |
| <i>Locustella naevia</i>       | Megaluridae    | Passeriformes |
| <i>Pycnonotus barbatus</i>     | Pycnonotidae   | Passeriformes |
| <i>Aegithalos caudatus</i>     | Aegithalidae   | Passeriformes |
| <i>Alauda arvensis</i>         | Alaudidae      | Passeriformes |
| <i>Galerida cristata</i>       | Alaudidae      | Passeriformes |
| <i>Galerida theklae</i>        | Alaudidae      | Passeriformes |
| <i>Lullula arborea</i>         | Alaudidae      | Passeriformes |
| <i>Corvus cornix</i>           | Corvidae       | Passeriformes |
| <i>Garrulus glandarius</i>     | Corvidae       | Passeriformes |
| <i>Lanius excubitor</i>        | Laniidae       | Passeriformes |
| <i>Lanius collurio</i>         | Laniidae       | Passeriformes |
| <i>Lanius senator</i>          | Laniidae       | Passeriformes |
| <i>Tchagra senegala</i>        | Malaconotidae  | Passeriformes |
| <i>Oriolus oriolus</i>         | Oriolidae      | Passeriformes |
| <i>Cuculus canorus</i>         | Cuculidae      | Cuculiformes  |
| <i>Clamator glandarius</i>     | Cuculidae      | Cuculiformes  |
| <i>Dendrocopos medius</i>      | Picidae        | Piciformes    |
| <i>Dendrocopos major</i>       | Picidae        | Piciformes    |
| <i>Dendrocopos minor</i>       | Picidae        | Piciformes    |
| <i>Picus canus</i>             | Picidae        | Piciformes    |
| <i>Picus viridis</i>           | Picidae        | Piciformes    |
| <i>Picus vaillantii</i>        | Picidae        | Piciformes    |
| <i>Dryocopus martius</i>       | Picidae        | Piciformes    |
| <i>Jynx torquilla</i>          | Picidae        | Piciformes    |
| <i>Columba oenas</i>           | Columbidae     | Columbiformes |
| <i>Columba palumbus</i>        | Columbidae     | Columbiformes |
| <i>Streptopelia turtur</i>     | Columbidae     | Columbiformes |
| <i>Alectoris rufa</i>          | Phasianidae    | Galliformes   |
| <i>Coturnix coturnix</i>       | Phasianidae    | Galliformes   |
